# What are housekeeping genes?

Chintan J. Joshi<sup>1</sup>, Wenfan Ke<sup>2</sup>, Anna Drangowska-Way<sup>2</sup>, Eyleen J. O'Rourke<sup>2\*</sup>, Nathan E. Lewis<sup>1,3,4\*</sup>

<sup>1</sup> Department of Pediatrics, University of California, San Diego, School of Medicine, La Jolla, CA 92093

<sup>2</sup> Department of Biology and Cell Biology, University of Virginia, Charlottesville, VA 22903

<sup>3</sup> Novo Nordisk Foundation Center for Biosustainability at the University of California, San Diego, School of Medicine, La Jolla, CA 92093

<sup>4</sup> Department of Bioengineering, University of California, San Diego, La Jolla, CA 92093

\* Corresponding author:

Name: Nathan E. Lewis

Address: 9500 Gilman Drive MC 0760, La Jolla, CA 92093

E-mail: [nlewisres@ucsd.edu](mailto:nlewisres@ucsd.edu)

\* Co-corresponding author:

Name: Eyleen J. O'Rourke

E-mail: [ejo8b@virginia.edu](mailto:ejo8b@virginia.edu)

Classification:

Major: Biological Sciences

Minor: Evolutionary Biology; Biophysics and Computational Biology; and Systems Biology

Keywords: omics data, systems biology, housekeeping genes

## 25 **Abstract**

26 Two gene classes that have proven useful in understanding the phenotypic states of cells are  
27 housekeeping genes and essential genes. Housekeeping genes are often defined as stably expressed in  
28 mRNA expression experiments, as essential for cellular maintenance in functional analyses, or both. This  
29 imprecise definition can suggest that stably expressed genes are essential for cellular maintenance.  
30 Although defining whether there is a relationship between stable expression and essentiality (deleterious  
31 if not expressed) would not only aid in the design of experiment controls but could also reveal some  
32 fundamental biological principles, this question has not been formally approached. Gini coefficient has  
33 been proposed to identify housekeeping genes that we refer to as Gini genes. We use transcriptomics and  
34 functional genomics data to identify and characterize Gini genes in several human datasets, and across 12  
35 species, that include human, chicken, and *C. elegans*. We show that Gini coefficients are highly correlated  
36 across human tissue and human cancer datasets. We also show that the Gini coefficients of Gini genes  
37 that are conserved (1:1 human orthologs) across different organisms can capture taxonomic groups such  
38 as primates. We find that essential genes tend to have lower Gini coefficients suggesting that Gini genes  
39 may also be essential. Thus, we provide here not only experimental basis for defining housekeeping  
40 genes; we also show that these genes capture organism-specific biology.

## 41 **Significance**

42 Housekeeping genes are considered to be consistently expressed across cell types due to being essential  
43 for cellular maintenance. These genes have been known to have unique evolutionary and genomic  
44 features, to be markers of organismal health, and for benchmarking gene expression experiments. Here  
45 we present the first quantitative experimental support for this definition. We further show that across  
46 species the list of housekeeping genes can vary drastically, despite being highly correlated at pathway-  
47 level. Finally, we provide a resource and computational pipeline for identifying housekeeping genes and  
48 lists of housekeeping genes for 12 different organisms.

## 49 **Introduction**

50 Analysis of large-scale “omics” data is now commonplace<sup>1</sup>, applied to a gamut of questions<sup>2-5</sup> and  
51 organisms<sup>6-13</sup>. This situation is rife with opportunities to study the molecular bases of phenotypes and  
52 biological principles within and across organisms<sup>11,14,15</sup>. One key feature in all organisms is housekeeping  
53 genes. Housekeeping genes are often identified by being stably expressed in all samples/conditions  
54 (tissues, environments, cell lines, etc.)<sup>16</sup>. Additionally, the most pervasively used definition invokes  
55 essentiality (as in, required or necessary for cell survival)<sup>16-20</sup>. However, stability (similar expression  
56 across cell types and conditions) and essentiality (loss-of-function) are two very different features of a  
57 gene with different levels of regulation, that manifest at different levels of organization, and have not  
58 been shown to be related. Here, we present an experimental basis for this definition, and define  
59 housekeeping genes for several species.

60 Predefining housekeeping genes for an organism brings several potential benefits. At the experimental  
61 level, it can save in troubleshooting for the identification and validation of mRNA expression controls in  
62 difficult cell types (i.e. reticulocytes) and unique samples (i.e. patient biopsies) analyzed via  
63 transcriptomics<sup>20</sup> and quantitative real-time PCR (qRT-PCR)<sup>21</sup>, as well as more robust ways to normalize  
64 the growing number of single-cell RNAseq studies. Indeed, one can look for expression levels for these  
65 genes, as has been done historically. However, a better list of candidates may be possible if there was a  
66 way to systemically identify a large list of these genes from transcriptomics datasets.

67 At the systems level, housekeeping genes can be defined as the minimal set of genes required to sustain  
68 life<sup>22</sup> and markers of an organism's healthy biological state<sup>23</sup>. At the evolutionary level, they may allow us  
69 to define organism-specific unique genomic<sup>24-26</sup> and evolutionary features<sup>26-28</sup>. Thus, knowledge of  
70 housekeeping genes can significantly contribute to explorative, basic, and translational studies. Despite  
71 these and other potential benefits, a list of housekeeping gene candidates for multiple species has not yet  
72 been produced.

73 Recently, we presented StanDep, a pipeline for constructing context-specific metabolic network models.  
74 StanDep effectively captures metabolic housekeeping genes, defined as genes expressed in most of the  
75 analyzed contexts (tissues, cell types, cell lines, etc.)<sup>29</sup>. The ability of StanDep to capture housekeeping  
76 genes can be attributed to its effectiveness at capturing transcriptomic variability among different  
77 samples. Other recent efforts have been made to identify housekeeping genes<sup>16,21,30,31</sup>. A particularly  
78 powerful approach is a mathematical framework called GeneGini<sup>28,30,31</sup> which leverages the Gini  
79 coefficient ( $G_C$ ), a statistical metric quantifying inequality among groups<sup>32</sup>.  $G_C$  varies from 0 to 1; in  
80 Economics, lower Gini coefficients mean lower income inequality. Similarly, in the framework of our  
81 work, the  $G_C$  of a gene is proportional to the inequality in its expression across samples<sup>30</sup>. Therefore,  
82 genes with a low  $G_C$  (referred to as Gini genes here on) are stably expressed, and could be considered  
83 housekeeping genes. However, many questions remain about Gini genes. Do these genes retain their  
84 housekeeping status across species? Which cellular functions are they responsible for? How essential are  
85 they? Answers to these questions are central to the definition of a housekeeping gene and efforts to  
86 understand their biological relevance.

87 Here, we used the  $G_C$  approach to identify Gini (or housekeeping) genes in human tissue and cell  
88 lines<sup>7,10,33-36</sup>. We show that  $G_C$  values were highly correlated across human datasets and that the  
89 correlation was higher between datasets of similar samples (e.g. correlation between GTEx and HPA was  
90 higher than that between GTEx and CellMiner). We also applied  $G_C$  analysis to transcriptomics datasets  
91 of 12 different organisms which include those in Brawand et al.<sup>33</sup>, humans<sup>10,34,35,37</sup>, *C. elegans*<sup>6</sup>, Chinese  
92 hamster tissues<sup>38</sup> and Chinese hamster ovary (CHO) cells. We show that the list of Gini genes may  
93 capture species relevant features and yet maintain a high across-species correlation when analyzed as GO  
94 terms. Using CRISPR-Cas9 essentiality screen of CHO<sup>39</sup> and cancer cell lines<sup>40-42</sup>, and whole-animal  
95 essentiality RNAi screening of *C. elegans*, we show that essential genes tend to have lower  $G_C$ . Further,  
96 we also show that Gini genes and essential genes significantly overlap in their functions. Further, we  
97 provide a list of housekeeping genes with their Gini coefficient for each of the datasets used in this  
98 analysis. Thus, our analysis provides an experimental basis for the concept of housekeeping gene.

## 99 **Results**

### 100 **GAPDH may not be a good candidate as a housekeeping gene**

101 Glyceraldehyde 3-phosphate dehydrogenase (GAPDH) is the most commonly used housekeeping gene to  
102 benchmark expression of other genes in qRT-PCR analyses. To define the appropriateness of GAPDH as  
103 a housekeeping gene, we started with previously published transcriptomics data belonging to CHO cells,  
104 hamster tissues<sup>38</sup>, human tissues from Genotype-Tissue Expression (GTEx) project<sup>34</sup> and Human Protein  
105 Atlas (HPA)<sup>10</sup>, and NCI-60 cancer cells (Klijn et al.<sup>35</sup>, and CellMiner<sup>43</sup>). We calculated the  $G_C$  for these  
106 datasets and then compared the  $G_C$  of GAPDH across the 7 datasets.

107 Low  $G_C$  represents low variability in level of expression across tissues or samples, as would be expected  
108 for housekeeping genes. However, our analyses indicated that the  $G_C$  values for GAPDH were very  
109 different across all human and hamster datasets. For instance, Klijn et al. (i.e., NCI-60 cell lines) showed  
110 the lowest  $G_C$  value was at 14.6 percentile and hamster tissue had the highest  $G_C$  value at 57.6 percentile

111 (Figure 1A). The  $G_C$  values in human datasets varied by 18 percentiles while hamster and CHO data  
112 differed by 35.3 percentiles. Thus, the high variability in  $G_C$  percentiles indicate that GAPDH may not be  
113 a good candidate as a housekeeping gene as it is not as stably expressed as generally thought.

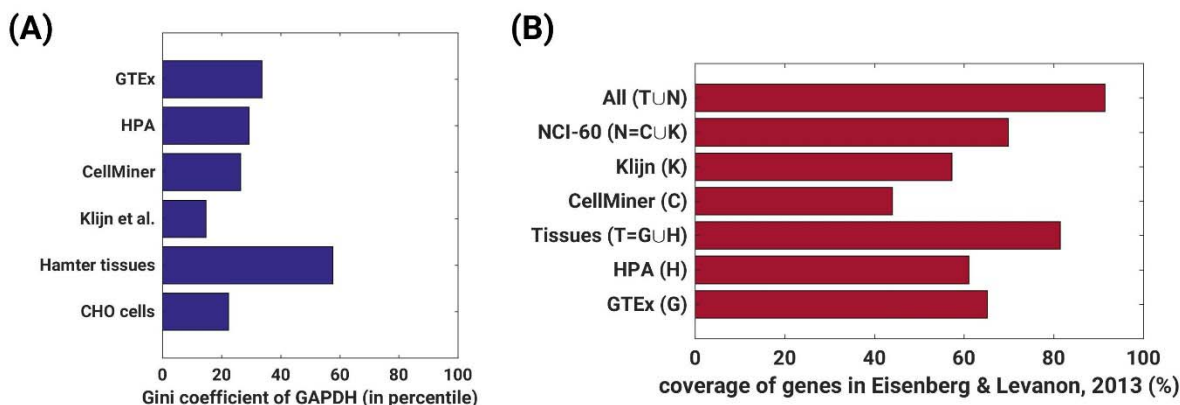

114  
115 **Figure 1. Analysis of previously identified housekeeping genes.** (A) Glyceraldehyde 3-phosphate dehydrogenase  
116 (GAPDH) may not be a good choice for housekeeping gene. Gini coefficients were converted to percentiles (x-axis)  
117 using each of the datasets (y-axis). GAPDH has high Gini coefficient in most of the datasets. (B) Coverage of  
118 previously identified 3688 housekeeping genes<sup>16</sup> within the 3688 Gini genes with lowest Gini coefficients within  
119 each of the datasets.

#### 120 **Gini coefficient identifies consistently expressed genes across different datasets**

121 Housekeeping genes, by definition, should have low  $G_C$  (low inequality across samples). To test whether  
122 Gini genes had low  $G_C$ , as expected for housekeeping genes, we first tested whether Gini genes are found  
123 across two datasets of the same organism. For this we compared the list of Gini genes we extracted from  
124 human tissue datasets from HPA and GTEx, and from the NCI-60 Cancer datasets from CellMiner and  
125 Klijn et al. We further compared the Gini genes to a previously published list of 3688 housekeeping  
126 genes<sup>16</sup>. For this analysis, we chose 3688 Gini genes for each dataset.

127 15687 genes were present in both human tissue datasets, 16052 genes were present in both NCI-60 cancer  
128 datasets, and 14327 genes were present in all 4 datasets. From each dataset, Gini genes were the 3688  
129 genes that have the lowest  $G_C$  to account for different shapes of Gini coefficient distributions (Fig. S1A).  
130 Gini genes obtained from combining lists from datasets of same sample types had a coverage of 81.4%  
131 and 69.8% of the 3688 previously reported housekeeping genes, for tissue datasets and NCI-60 cancer  
132 datasets, respectively (Figure 1B). Further, the  $G_C$  for genes present in a given pair of datasets were  
133 highly correlated, and more so for datasets of the same sample types (Figure 2A). Yet, we found that for  
134 all datasets, previously identified housekeeping genes had low  $G_C$  values (Fig. S1B).

135 The lower accuracy of cancer datasets is expected as previously identified housekeeping genes were  
136 defined using human tissue transcriptomics. However, since both the datasets are of human cells, this is  
137 also reflected in, not only the correlation coefficient but also in the ~70% accuracy of the combined  
138 prediction from cancer datasets. In the absence of data to remove batch effects, it is difficult to control for  
139 other factors. Cross comparison of  $G_C$  of Gini genes revealed that the median of these genes was very  
140 similar (Fig. S2). These results together suggest that Gini genes for a given species will consistently have  
141 low  $G_C$  regardless of sample types or dataset being considered.

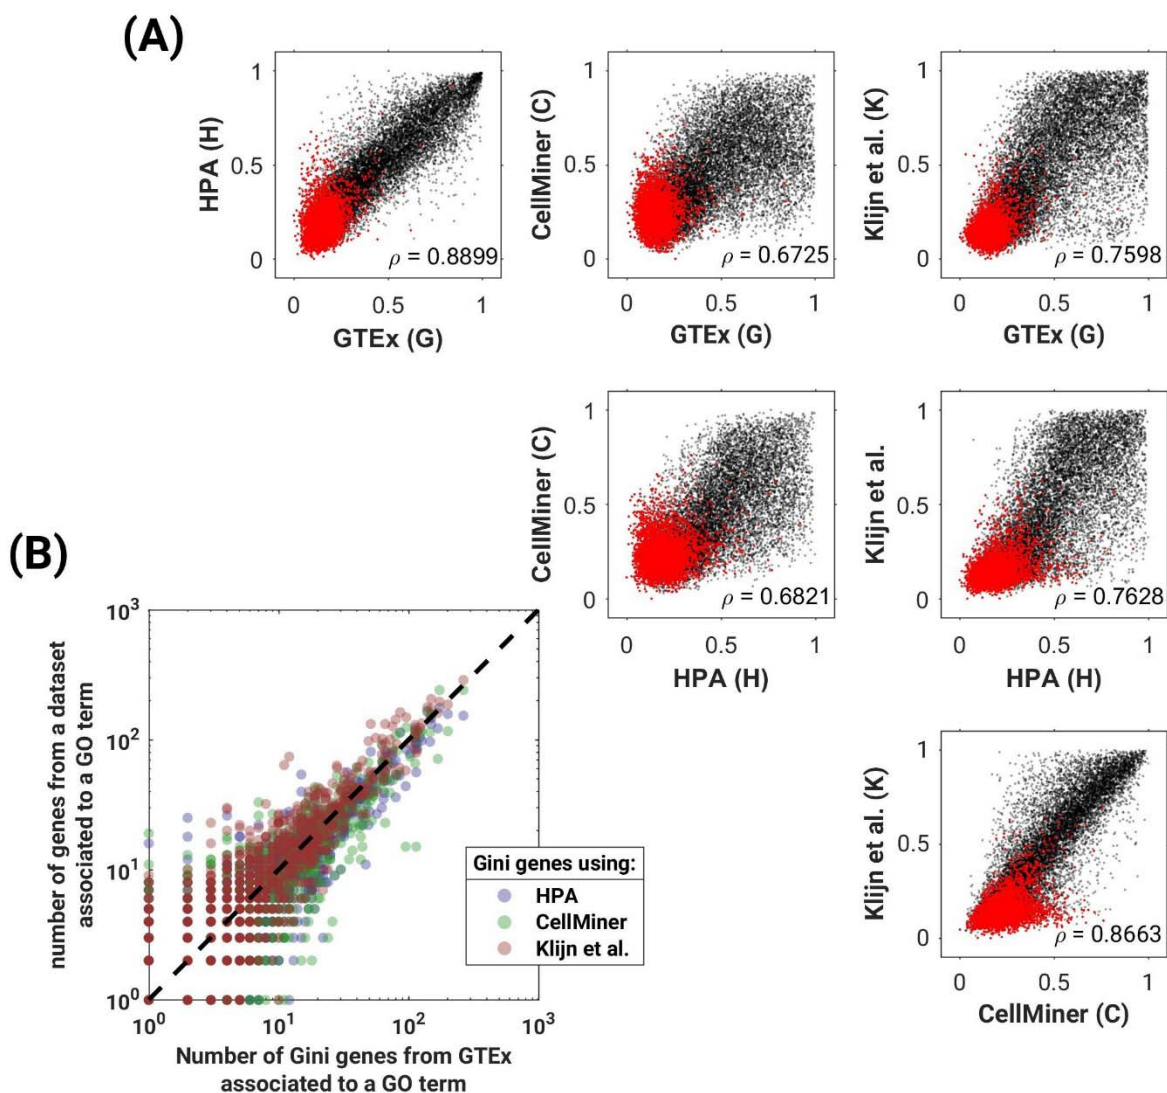

142  
 143 **Figure 2. Gini coefficients are highly correlated for human datasets.** (A) Gini coefficients of genes are highly  
 144 correlated across human datasets, regardless of sample type. Datasets of sample types are more highly correlated  
 145 than those of different sample types. (B) GO term coverage is highly correlated across human datasets.

146 **Gini genes preserve organism-specific information**

147 The correlation of  $G_C$  across datasets supports the idea that the Gini genes belong to similar pathways  
 148 across datasets. To test this hypothesis, we performed GO term enrichment analysis on the Gini genes  
 149 identified in the transcriptomic analyses just described above.

150 Across the sample types, we found 1189 GO terms enriched in at least one dataset (Fig. S3, Table S1). To  
 151 minimize undesired influence from changes in the number of subject or query genes for the  
 152 hypergeometric test, we analyzed all the 1189 GO terms across all datasets. Background frequency of a  
 153 GO term was defined using all the genes in each dataset for which  $G_C$  was calculated. We found that  
 154 coverage of these GO terms (ratio of number of Gini genes to the number in the background in a GO  
 155 term) was highly correlated across datasets ( $\rho_{\text{mean}} = 0.93$  across 6 pairs of datasets; Figure 3E (red box)).  
 156 This comparison is shown for dataset pairs involving GTEx in Figure 2B. These results suggest that  
 157 human Gini genes are enriched for some biological functions. However, the high correlation in enriched

158 GO terms between these datasets could also be due to datasets belonging to the same organism, i.e.  
 159 humans.

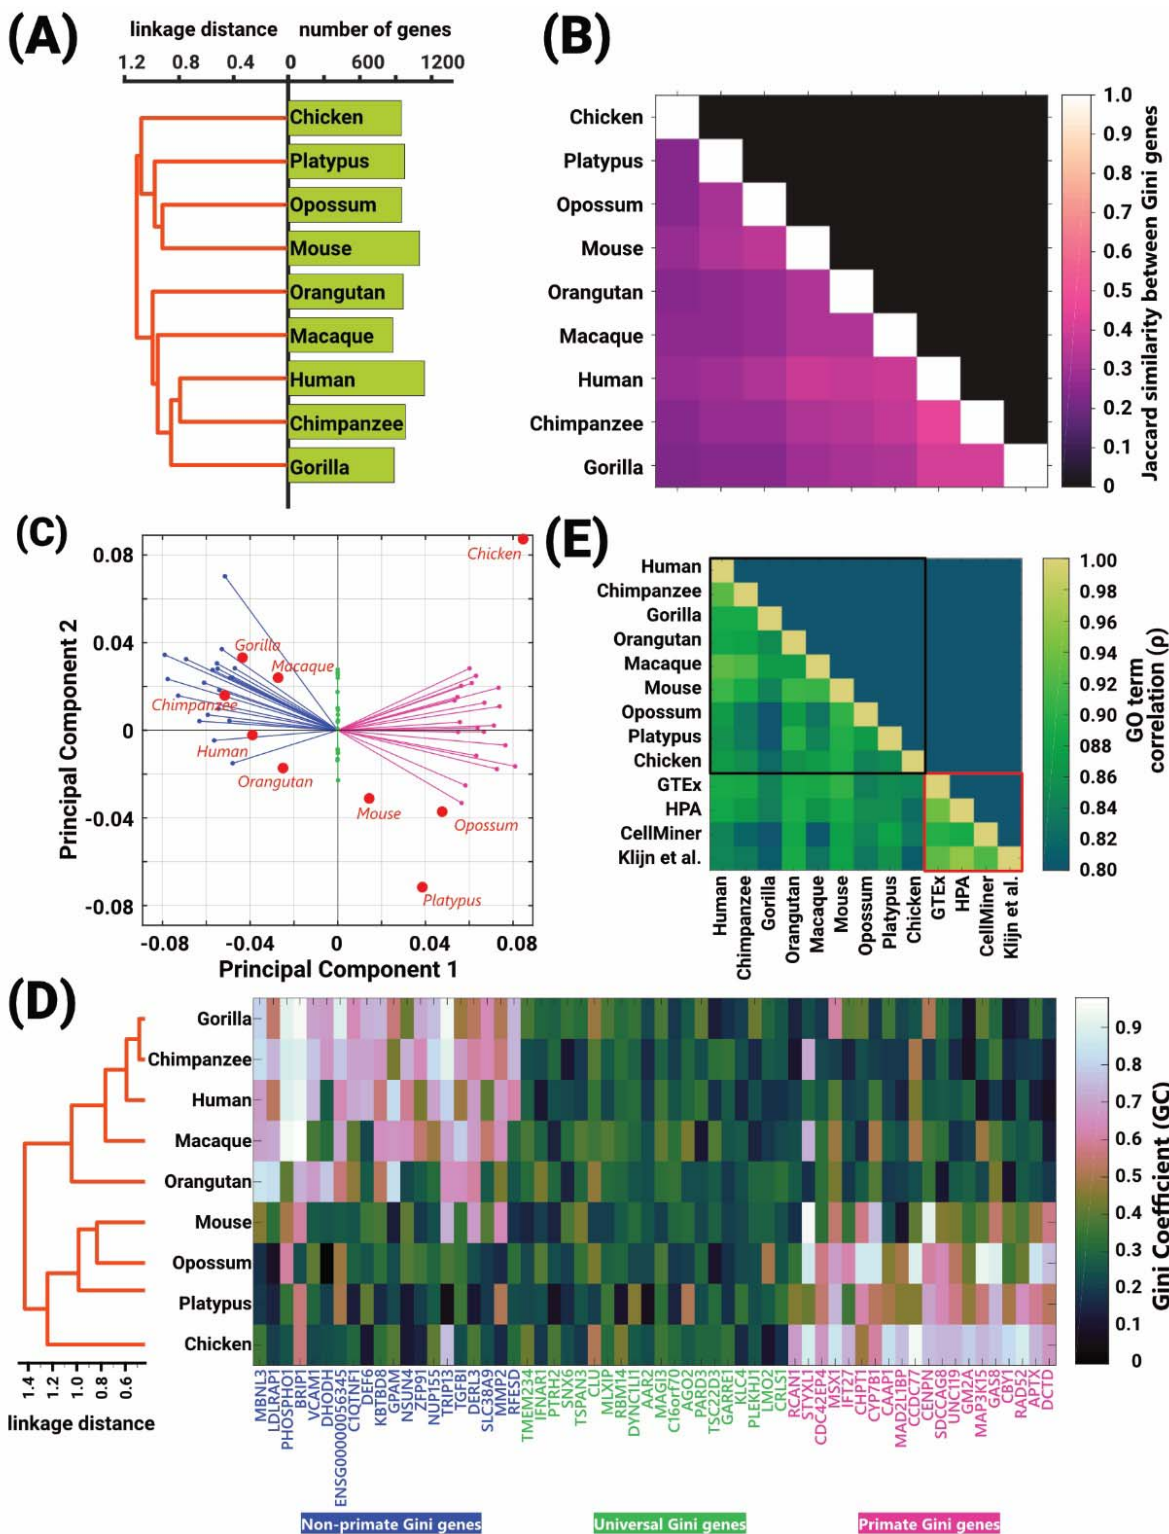

160  
 161 **Figure 3. Gini coefficients accurately capture organism-specific differences.** (A-B) Jaccard similarity between  
 162 Gini genes identified using organism-specific transcriptomes capture cluster containing primates. The number of  
 163 Gini genes with 1:1 orthologs in all organisms is shown using the bar plot on the right of the dendrogram. (C)

164 Principal component 1 (PC1) also captures the cluster containing primates. Also shown are the top 20 primate Gini  
165 genes (pink), the top 20 shared Gini genes (green), and top 20 Gini genes in all non-primates (blue) using the  
166 principal component coefficients of the first principal components. (D) Correlation among Gini coefficients across  
167 different organisms reproduce cluster containing primates (left panel). The Gini coefficients of genes belonging to  
168 top 20, middle 20, and bottom 20 coefficients of PC1 are shown (right panel). Left 20 Gini genes are specific to non-  
169 primates, middle 20 Gini genes are shared, and right 20 Gini genes are specific to primates. (E) GO term coverage is  
170 highly correlated across different datasets, also shown are the GO term correlations with human datasets used in  
171 Figure 1.

172 Next, we adapted and applied our analysis to a previously published 9 endothermal organisms<sup>33</sup> dataset  
173 that includes chicken, platypus, opossum, mouse, macaque, orangutan, gorilla, chimpanzee, and humans.  
174 Since most of these organisms do not have a Gene Ontology available, we analyzed only the 1:1 orthologs  
175 across all these organisms, i.e. 5423 genes. Another advantage is also that one can control for the number  
176 of subject genes which will be same as the 5423 genes; effectively removing the influence of sample size  
177 in the statistical tests. For the purpose of this exercise, Gini genes were defined by applying a threshold at  
178 17.5 percentile.

179 Interestingly, we found that Gini genes (Figure 3A and 3B) and correlations of Gini coefficients (Figure  
180 3C) of 1:1 orthologs were able to cluster primate mammals from egg laying - chicken and metronome  
181 (platypus), and marsupials - mouse, and opossum. Different from the analyses of human datasets shown  
182 above, we found lower correlations among Gini values when comparing the 9 endothermal species than  
183 those found amongst human datasets (Figure 3B). Importantly, Principal Component Analysis (PCA) on  
184 these data was able to reproduce the cluster consisting of primates and the cluster consisting of other  
185 organisms (Figure 3C, dendrogram). The first two principal components accounted for 45.4% of the  
186 explained variation (Fig. S4). The first principal component determined the primate cluster; and, at the  
187 same time, revealed genes for which expression pattern remained conserved across tissues for all  
188 organisms (Figure 3D, green), primates only (Figure 3D, pink), or non-primates only (Figure 3D, blue).  
189 Interestingly, similar to human datasets, the coverage of GO terms (Table S2) associated with Gini genes  
190 was highly correlated across all the organisms (Figure 3E (black box)). These results together show that  
191 Gini genes contain important information about species-specific biology, yet higher-level features, such  
192 as GO terms, are shared by all Gini genes.

### 193 **Gini genes are essential**

194 Considering Gini genes are similar across different organisms, they are likely to also be essential for  
195 survival of these organisms. Due to technological and ethical limitations, it is difficult to test all  
196 organisms mentioned above. Therefore, we compared gene essentiality in CRISPR-Cas9 screens with  
197 Gini genes of CHO and human cancer cell lines. For cancer cell lines, we used CRISPR guide-RNA score  
198 (log-fold change of guide-RNA) from Depmap<sup>40,41</sup>. For CHO cells, we used the list of genes from a  
199 published study (Table S6 for accession IDs).

200 Across 20 cancer cell lines, 72% of Gini genes had a negative CRISPR score; and thus, were essential.  
201 We also found that 2800 genes essential in all 20 cancer cell lines also had lower  $G_C$ , when calculated  
202 using transcriptomics data for 20 cell lines from Klijn et al. and CellMiner (Figure 4A and B). Similar  
203 results were observed for 338 essential genes in CHO (Figure 4C). Thus, suggesting that essential genes  
204 have lower  $G_C$  and are more likely to be Gini genes too.

205 Since gene essentiality is context and health-status dependent, we investigated the correlation between  $G_C$   
206 and gene essentiality in a healthy living animal model. We identified Gini genes in *C. elegans* using a  
207 previously published transcriptomics dataset<sup>6</sup> and whole animal RNAi screen of all 1535 predicted  
208 metabolic genes in the worm (Ke W. and Drangowska-Way A. *et al*, unpublished). Three relevant

209 phenotypic classes were observed in RNAi-treated *C. elegans*: 1) high-confidence essential, after 5 days  
210 of incubation at 25C animals were arrested at a pre-adulthood stage in  $\geq 5$  out of the 6 independent RNAi  
211 treatments against that gene; 2) Medium confidence essential, animals did not reach adulthood in  $\geq 3$  out  
212 of the 6 independent RNAi treatments; and 3) Wild-type (Please see Supplementary Methods for details).  
213 Here, too, we found that essential genes (high confidence and medium confidence classes) had  
214 significantly lower Gini coefficients than the rest of the tested genes (Table 1, Table S4).

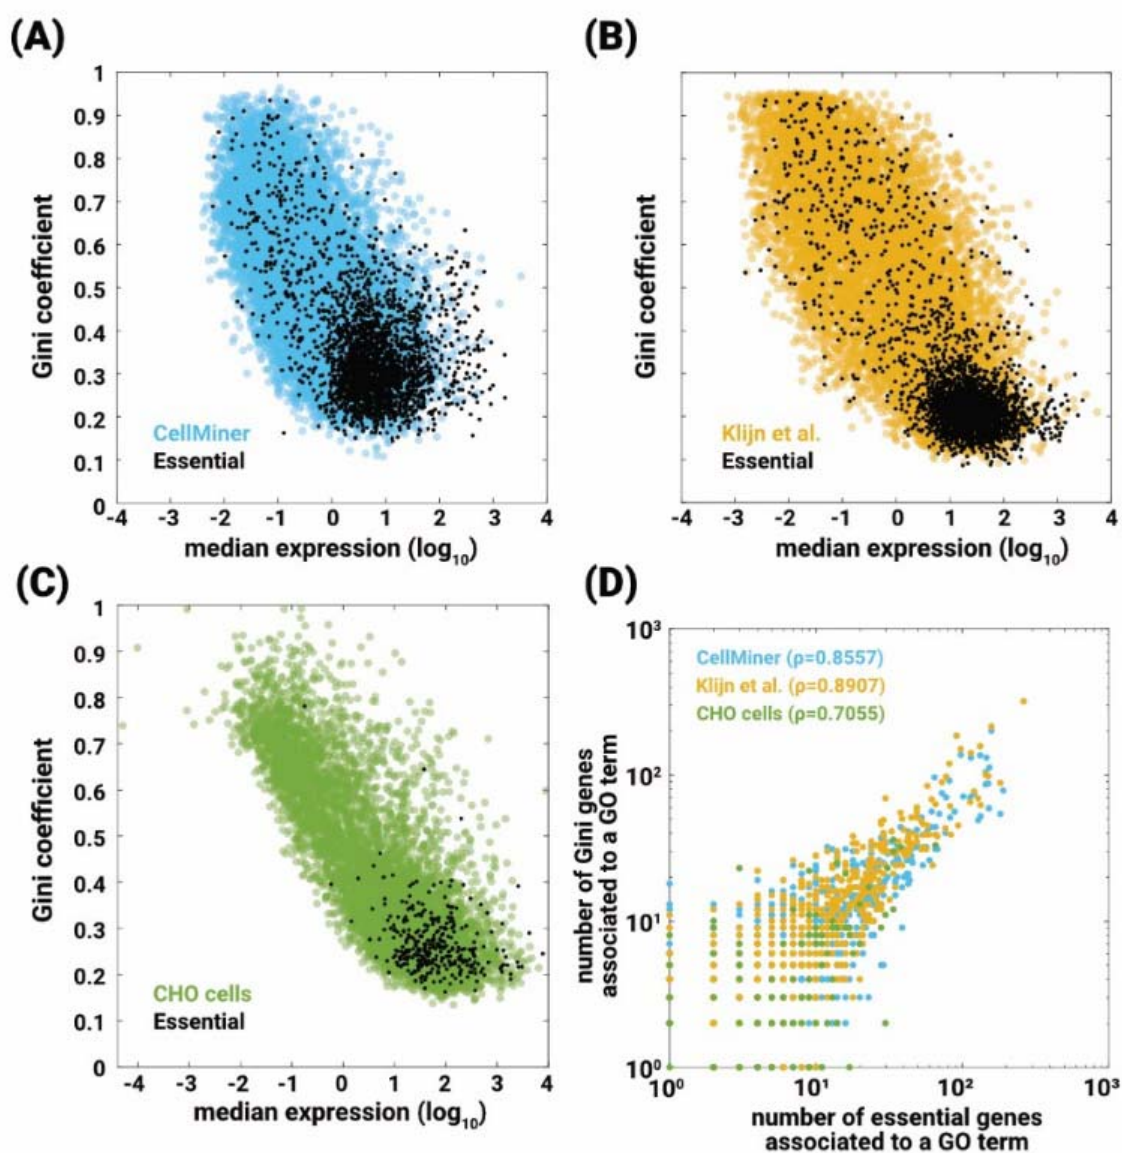

215  
216 **Figure 4. Gini genes are essential.** Gini coefficients of essential genes compared to the complete (A) CellMiner,  
217 (B) Klijn et al. cancer datasets, and (C) CHO datasets. 2800 genes essential in 20 cell lines were extracted from  
218 DepMap<sup>40,41</sup>, and 338 CHO essential genes (Table S5) were extracted from Kai et al.<sup>39</sup> (D) GO term coverage of  
219 essential genes and that of Gini genes from CellMiner (blue, 0.8557), Klijn et al. (yellow, 0.8907), and CHO (green,  
220 0.7055) are correlated. The slightly lower correlation in CHO cells is likely due to fewer number of essential genes  
221 in CHO.



| Geneset             | Geneset definition          | Number of genes in each class | Number of genes for which $G_C$ was calculated <sup>(a)</sup> | Sign test (median $G_C^{\text{geneset}} < \text{median } G_C^{\text{all}}$ ) |
|---------------------|-----------------------------|-------------------------------|---------------------------------------------------------------|------------------------------------------------------------------------------|
| <b>G1</b>           | High confidence essential   | 48                            | 38                                                            | $5.808 \times 10^{-5}$                                                       |
| <b>G2</b>           | Medium confidence essential | 64                            | 49                                                            | 0.0427                                                                       |
| <b>G1 + G2</b>      |                             | 112                           | 87                                                            | $4.5304 \times 10^{-5}$                                                      |
| <b>G3</b>           | Wild-type                   | 1095                          | 532                                                           | 0.9814                                                                       |
| <b>G4</b>           | Untested <sup>(b)</sup>     | 174                           | 97                                                            | 0.0335                                                                       |
| <b>G1 + G2 + G4</b> |                             | 286                           | 184                                                           | $9.3050 \times 10^{-5}$                                                      |
| <b>G5</b>           | Unknown <sup>(c)</sup>      | 94                            | 58                                                            | 0.347                                                                        |

222 **Table 1. Whole animal essential genes in *C. elegans* have significantly lower Gini coefficient than non-**  
 223 **essential genes.** (a) Numbers in this column are smaller than in column C because genes with  $G_C$  equal to zero were  
 224 excluded from the analysis. (b) Untested includes genes with strong effects on health and/or development that  
 225 prevented us from obtaining large enough populations of worms for quantitative analyses. These observations are in  
 226 agreement with the low gene essentiality correlation p value observed for this class. (c) Untested core metabolic  
 227 gene due to lack of RNAi clone or other technical limitations.

228 GO terms of Gini genes are highly correlated across different datasets and organisms (Figure 2B, Figure  
 229 3E). Thus, we also performed GO term analysis for essential and Gini genes in CHO and cancer cell lines.  
 230 The analysis of cancer cell lines revealed that coverage of GO terms for the 2800 essential genes is highly  
 231 correlated with that of same number of Gini genes identified using Klijn et al. (Figure 4D, yellow;  $\rho =$   
 232  $0.8907$ ) and CellMiner (Figure 4D, blue;  $\rho = 0.8596$ ). A similar comparison between CHO essential  
 233 genes and Gini genes (at 17.5 percentile) also resulted in a high correlation of  $\rho = 0.9557$  (Figure 4D,  
 234 green). Together these results suggest that Gini genes and essential genes show the same distribution, and  
 235 hence, are likely largely overlapping.

## 236 Discussion

237 Historically, housekeeping genes have been defined as genes that are consistently expressed across  
 238 tissues, and often thought to be essential. Extending from this definition, genes qualified as  
 239 “housekeeping” are extensively used in benchmarking and normalizing gene expression results in diverse  
 240 experimental settings, including qRT-PCR, bulk and single-cell transcriptomics, *in situ* hybridization,  
 241 western blots, FACS, etc. Further, housekeeping genes are expected to convey important information  
 242 about the needs of an organism. However, systematic investigation of whether the underlying biology  
 243 supports the current definition of housekeeping genes has been mostly lacking (Supplementary Results).  
 244 Thus, we extensively evaluated the claims of this definition by spanning our analysis across datasets  
 245 belonging to a variety of organisms. As a result, we provide an experimentally supported list of Gini  
 246 genes (Table S3) and formalize the evidence in support of the notion that we can call these Gini genes  
 247 housekeeping genes as they are expressed across tissues and species. Further, we validate the notion that  
 248 housekeeping genes are enriched in, though not necessarily are, essential genes.

249 Gini coefficient ( $G_C$ ) is a statistical metric that allows one to identify inequality in gene expression across  
 250 different samples.  $G_C$  has recently been shown to identify housekeeping genes in human cells<sup>30,31</sup>.  
 251 However, it remained unclear whether housekeeping genes are “housekeeping” across species. Besides,  
 252 application to other datasets and organisms, we also study the properties of  $G_C$ -identified housekeeping

253 genes. We referred to these genes with low  $G_C$  as Gini genes. The low  $G_C$  of these genes suggests that  
254 they are more equally, i.e. consistently, expressed across samples. Therefore, we here show that Gini  
255 genes are expressed at a wide range of expression levels, they are likely to be essential, and that they  
256 share functions across different datasets.

257 Scientific articles often define housekeeping genes as being required for cellular maintenance. However,  
258 they are most often identified through searching for genes with consistent expression across samples.  
259 Thus, though two important properties of housekeeping genes are: (i) they belong to cellular maintenance  
260 pathways; and hence, (ii) their functions are “essential”, to the best of our knowledge, there has not been a  
261 study that quantitatively tests the basis for neither of these two implicit, and often explicit, claims. This is  
262 despite the reality that the importance of characterizing a list of essential genes has garnered significant  
263 interest<sup>44-47</sup>. Hence, here we quantitatively test these claims about housekeeping genes. Firstly, for the  
264 claim of essentiality, using CHO and cancer gene essentiality CRISPR-Cas9 screens, we show that the  
265 majority, but not all, of consistently expressed genes (Gini genes) are essential. Secondly, we show that  
266 there is a high correlation in GO terms derived from Gini genes from different datasets, suggesting that  
267 Gini genes are indeed coming from population of genes with similar molecular functionalities, as  
268 described by GO terms, across different datasets. However, given the vagueness of the term “cellular  
269 maintenance”, it is rather arbitrary to decide whether housekeeping genes are preferentially associated to  
270 this term.

271 Another gap in the current understanding of housekeeping genes is whether they are “housekeeping”  
272 across species. Gini genes calculated using multi-organism datasets showed high GO term correlation  
273 across organisms, suggesting conservation of housekeeping pathways. However, this correlation across  
274 species is slightly reduced when compared to the correlation across human datasets (Figure 3E). It is  
275 possible that this reduced correlation is due to data limitations. The pathway analyses presented here were  
276 done using human GO terms; therefore, genes from any given organism were mapped to corresponding  
277 human orthologs and gene identifiers. Of course, this process eliminated many Gini genes. In fact, the 1:1  
278 ortholog-based GO term analysis used here resulted in eliminating, on average, 69% of the Gini genes  
279 from each of the 9 organisms analyzed. Therefore, availability of gene ontology beyond model organisms  
280 can provide molecular insight into species-specific biology.

281 Until now, the concept of housekeeping was often described using a list of genes; in the framework of  $G_C$ ,  
282 selecting housekeeping genes would require thresholding such that genes which have a  $G_C$  below a  
283 certain value may be regarded as housekeeping genes. However, thresholding eliminates possibly  
284 meaningful information. Indeed, our PCA of genes showed that principal component containing the  
285 highest variation (39.5%) did not explain Gini values in distinctly some of the 9 organisms (Fig. S5). Gini  
286 values for large number of genes were needed to capture species-specific clusters. In this study, we also  
287 show that even though fewer GO terms were enriched in all the datasets or organisms, the coverage of  
288 GO terms that were enriched in each dataset was highly correlated across datasets. These results suggest  
289 that housekeeping functions, rather than a list of genes, are better described as the state of the organism.  
290 This explanation has been suggested previously<sup>49</sup>. To test such a hypothesis, there would be a need to  
291 prepare models of these organisms at multiple levels of regulation that could simulate and quantify an  
292 organismal phenotype. Then, one could possibly test, for example, if carbon flux across different tissues  
293 of organisms is correlated. Indeed, this means there is a need for standardized models for diverse set of  
294 organisms<sup>50,51</sup>.

295 Key molecular similarities likely underlie the physiological similarities between related species. By  
296 crossing Gini coefficients with CRISPR-Cas9 essentiality screens and GO terms we may have captured  
297 some of these key molecular similarities as our analysis was able to distinguish primate from non-primate

298 endotherms. On the other hand, even though animals seem phenotypically very different they share  
 299 molecular similarities that we can capture at the level of GO terms, even if not at the level of specific  
 300 gene IDs. Nevertheless, what is essential across environmental contexts and taxonomic groups, if  
 301 anything, is worth future investigation. Our study only scratches the surface of the answer to these  
 302 questions and shows the need for organism-specific tools and models; but not just for model organisms,  
 303 we need models for a diverse set of organisms. Our study suggests that analysis of the ever-increasing  
 304 “omics” datasets presents an opportunity for better understanding of the biological functions fundamental  
 305 to sustain life and drive evolution.

## 306 **Method**

### 307 **Literature search**

308 We performed a literature search using Harzing’s Publish or Perish 7<sup>52</sup> to extract the top 1000 hits from  
 309 Google Scholar for the query keywords: housekeeping, genes, maintenance, and required. The list of top  
 310 1000 papers was downloaded to an excel sheet for further analysis and visualization on MATLAB.

### 311 **Data extraction**

312 Transcriptomic datasets were obtained from various sources (Table 2). To resolve differences in gene  
 313 identifiers, we mapped all to NCBI Entrez gene identifiers using BioMart, within the Ensembl website.  
 314 When genes did not map to an NCBI gene identifier, we discarded these genes from the analyses.

| <b>Organism (sample type)</b>                                                                | <b>Data source</b>                                                                                                                                                                                                                                                                                                                            | <b>Modifications</b>                |
|----------------------------------------------------------------------------------------------|-----------------------------------------------------------------------------------------------------------------------------------------------------------------------------------------------------------------------------------------------------------------------------------------------------------------------------------------------|-------------------------------------|
| <b>Transcriptomics</b>                                                                       |                                                                                                                                                                                                                                                                                                                                               |                                     |
| Human (tissues)                                                                              | HPA <sup>10</sup>                                                                                                                                                                                                                                                                                                                             | -                                   |
|                                                                                              | Brawand et al., 2011 <sup>33</sup>                                                                                                                                                                                                                                                                                                            | Converted to TPM from read per base |
|                                                                                              | GTE <sup>34</sup>                                                                                                                                                                                                                                                                                                                             |                                     |
| Human (NCI-60 cancer cell lines)                                                             | CellMiner <sup>43</sup>                                                                                                                                                                                                                                                                                                                       | -                                   |
|                                                                                              | Klijn et al. 2015 <sup>35</sup>                                                                                                                                                                                                                                                                                                               | -                                   |
| <i>C. elegans</i> (cell types)                                                               | Cao et al., 2017 <sup>6</sup>                                                                                                                                                                                                                                                                                                                 | -                                   |
| Chicken, Platypus, Orangutan, Bonobo, Gorilla, Chimpanzee, Macaque, Mouse, Opossum (tissues) | Brawand et al., 2011 <sup>33</sup>                                                                                                                                                                                                                                                                                                            | Converted to TPM from read per base |
| Chinese hamster (tissues)                                                                    | Shamie I.S.*, Duttke S.H.*, la Cour Karottki K.J., Han C.Z., Hansen A.H., Hefzi H., Xiong K., Li S., Roth S., Tao J., Lee G.M., Glass C.K., Kildegaard H.F., Benner C., Lewis N.E. A Chinese hamster transcription start site atlas that enables targeted editing of CHO cells. bioRxiv, (2020). DOI: 10.1101/2020.10.09.334045 <sup>38</sup> |                                     |
| Chinese hamster ovaries (cell lines)                                                         | See Table S6 for accession IDs                                                                                                                                                                                                                                                                                                                |                                     |
| <b>Essentiality screens</b>                                                                  |                                                                                                                                                                                                                                                                                                                                               |                                     |
| Human (NCI-60 cancer cell lines) – CRISPR-Cas9                                               | DepMap <sup>40-42</sup>                                                                                                                                                                                                                                                                                                                       | -                                   |

|                                       |                                                                                                                            |   |
|---------------------------------------|----------------------------------------------------------------------------------------------------------------------------|---|
| CHO cell lines – CRISPR-Cas9          | Kai et al. 2020 <sup>39</sup> and Table S5                                                                                 | - |
| <i>C. elegans</i> (cell types) - RNAi | Unpublished study provided by Eyleen J. O'Rourke; method described in Ke et al. 2018 <sup>53</sup> and Supplementary text. | - |

315 **Table 2. Data sources used for this study.**

### 316 **Gini Coefficient ( $G_C$ )**

317 The  $G_C$  measures the inequality in frequency distribution of a given parameter (e.g., levels of income,  
318 income mobility<sup>54</sup>, education<sup>55</sup>, etc.) compared to the frequency distribution of total population<sup>32</sup>. For  
319 analysis of transcriptomic data, the parameter is expression of a given gene and is compared against the  
320 total gene expression is distributed across different samples<sup>30</sup>. The  $G_C$  is calculated as the ratio of area  
321 between the Lorenz curve and line of equality over the total area under the line of equality. The Lorenz  
322 curve is the graphical representation of the distribution of a given parameter; and is given by eqn. (1):

$$L(F(x)) = \frac{\int_{-\infty}^x t f(t) dt}{\mu} \quad (1)$$

323 where  $\mu$  denotes the average,  $f(x)$  denotes the probability density function, and  $F(x)$  denotes the  
324 cumulative distribution function. The calculation was implemented in MATLAB (R2016b), for which the  
325 code is available at GitHub (<https://github.com/LewisLabUCSD/gene-gini-matlab>).

### 326 **Gene Ontology (GO) enrichment**

327 Due to lack of availability of unique gene ontologies for the different organisms discussed in the study,  
328 genes of the organisms that mapped to the human ortholog genes were used to identify the respective GO  
329 term. Here, hypergeometric tests were used to check whether the number of genes associated to a GO  
330 term, in the query list, are more significant given the distribution among GO terms in the subject gene list.  
331 GO terms associated to human genes were downloaded from Gene Ontology Consortium webpage  
332 (<http://current.geneontology.org/products/pages/downloads.html>). All analysis was focused only on the  
333 Biological Process (P) aspect. All p-values were calculated using hypergeometric test for  
334 overrepresentation reported after correction using the Benjamini Hochberg FDR.

### 335 **Financial Disclosure**

336 This work was supported by the NIGMS (grant no. R35 GM119850, NEL), a Lilly Innovation Fellows  
337 Award to CJ, and funding from the Keck Foundation (EJOR).

338 The funders had no role in study design, data collection and analysis, decision to publish, or preparation  
339 of the manuscript.

### 340 **Competing Interest**

341 The authors have declared that no competing interests exist.

### 342 **References**

- 343 1. Opdam, S. *et al.* A Systematic Evaluation of Methods for Tailoring Genome-Scale Metabolic  
344 Models. *Cell Syst.* **4**, 318-329.e6 (2017).
- 345 2. Lewis, N. E. *et al.* Large-scale in silico modeling of metabolic interactions between cell types in  
346 the human brain. *Nat. Biotechnol.* **28**, 1279–1285 (2010).

- 347 3. Mardinoglu, A. *et al.* Genome-scale metabolic modelling of hepatocytes reveals serine deficiency  
348 in patients with non-alcoholic fatty liver disease. *Nat. Commun.* **5**, 3083 (2014).
- 349 4. Shen, Y. *et al.* Blueprint for antimicrobial hit discovery targeting metabolic networks. *Proc. Natl.*  
350 *Acad. Sci. U. S. A.* **107**, 1082–7 (2010).
- 351 5. Kim, M. K. & Lun, D. S. Methods for integration of transcriptomic data in genome-scale  
352 metabolic models. *Comput. Struct. Biotechnol. J.* **11**, 59–65 (2014).
- 353 6. Cao, J. *et al.* Comprehensive single-cell transcriptional profiling of a multicellular organism.  
354 *Science* **357**, 661–667 (2017).
- 355 7. Uhlen, M. *et al.* A pathology atlas of the human cancer transcriptome. *Science* **357**, eaan2507  
356 (2017).
- 357 8. Creecy, J. P. & Conway, T. Quantitative bacterial transcriptomics with RNA-seq. *Curr. Opin.*  
358 *Microbiol.* **23**, 133–40 (2015).
- 359 9. Han, X. *et al.* Mapping the Mouse Cell Atlas by Microwell-Seq. *Cell* **172**, 1091-1107.e17 (2018).
- 360 10. Uhlen, M. *et al.* Tissue-based map of the human proteome. *Science (80-. ).* **347**, 1260419–1260419  
361 (2015).
- 362 11. Barbosa-Morais, N. L. *et al.* The Evolutionary Landscape of Alternative Splicing in Vertebrate  
363 Species. *Science (80-. ).* **338**, 1587–1593 (2012).
- 364 12. Song, Q., Ando, A., Jiang, N., Ikeda, Y. & Chen, Z. J. Single-cell RNA-seq analysis reveals  
365 ploidy-dependent and cell-specific transcriptome changes in Arabidopsis female gametophytes.  
366 *Genome Biol.* **21**, 178 (2020).
- 367 13. Ning, K. *et al.* Transcriptome profiling revealed diverse gene expression patterns in poplar  
368 (*Populus × euramericana*) under different planting densities. (2019)  
369 doi:10.1371/journal.pone.0217066.
- 370 14. Breschi, A. *et al.* Gene-specific patterns of expression variation across organs and species.  
371 *Genome Biol.* **17**, 151 (2016).
- 372 15. Yang, Y., Yang, Y.-C. T., Yuan, J., Lu, Z. J. & Li, J. J. Large-scale mapping of mammalian  
373 transcriptomes identifies conserved genes associated with different cell states. *Nucleic Acids Res.*  
374 **45**, 1657–1672 (2016).
- 375 16. Eisenberg, E. & Levanon, E. Y. Human housekeeping genes, revisited. *Trends Genet.* **29**, 569–574  
376 (2013).
- 377 17. Butte, A. J., Dzau, V. J. & Glueck, S. B. Further defining housekeeping, or ‘maintenance,’ genes  
378 Focus on ‘A compendium of gene expression in normal human tissues’. *Physiol. Genomics* (2001)  
379 doi:10.1007/s10857-005-4766-0.
- 380 18. Zhu, J., He, F., Hu, S. & Yu, J. On the nature of human housekeeping genes. *Trends Genet.* **24**,  
381 481–484 (2008).
- 382 19. Warrington, J. A., Nair, A., Mahadevappa, M. & Tsyganskaya, M. Comparison of human adult  
383 and fetal expression and identification of 535 housekeeping/maintenance genes. *Physiol.*  
384 *Genomics* **2000**, 143–147 (2000).
- 385 20. Thellin, O. *et al.* Housekeeping genes as internal standards: Use and limits. *J. Biotechnol.* **75**, 291–  
386 295 (1999).

- 387 21. Tilli, T. M., Da, C., Castro, S., Tuszynski, J. A. & Carels, N. A strategy to identify housekeeping  
388 genes suitable for analysis in breast cancer diseases. (2016) doi:10.1186/s12864-016-2946-1.
- 389 22. Koonin, E. V. How many genes can make a cell: The minimal-gene-set concept. *Annu. Rev.*  
390 *Genomics Hum. Genet.* **1**, 99–116 (2000).
- 391 23. Tu, Z. *et al.* Further understanding human disease genes by comparing with housekeeping genes  
392 and other genes. *BMC Genomics* **7**, 31 (2006).
- 393 24. Rach, E. A., Winter, D. R., Benjamin, A. M., Corcoran, D. L. & Ni, T. Transcription Initiation  
394 Patterns Indicate Divergent Strategies for Gene Regulation at the Chromatin Level. *PLoS Genet* **7**,  
395 1001274 (2011).
- 396 25. Russo, M., Natoli, G. & Ghisletti, S. Housekeeping and tissue-specific cis-regulatory elements:  
397 Recipes for specificity and recipes for activity. (2017) doi:10.1080/21541264.2017.1378158.
- 398 26. López-Maury, L., Marguerat, S. & Bähler, J. Tuning gene expression to changing environments:  
399 From rapid responses to evolutionary adaptation. *Nature Reviews Genetics* vol. 9 583–593 (2008).
- 400 27. Zhang, L. & Li, W. H. Mammalian Housekeeping Genes Evolve More Slowly than Tissue-  
401 Specific Genes. *Mol. Biol. Evol.* **21**, 236–239 (2004).
- 402 28. Kryuchkova-Mostacci, N. & Robinson-Rechavi, M. A benchmark of gene expression tissue-  
403 specificity metrics. *Brief. Bioinform.* **18**, 205–214 (2017).
- 404 29. Joshi, C. J. *et al.* StanDep: Capturing transcriptomic variability improves context-specific  
405 metabolic models. *PLoS Comput. Biol.* **16**, e1007764 (2020).
- 406 30. O’Hagan, S., Wright Muelas, M., Day, P. J., Lundberg, E. & Kell, D. B. GeneGini: Assessment  
407 via the Gini Coefficient of Reference “Housekeeping” Genes and Diverse Human Transporter  
408 Expression Profiles. *Cell Syst.* **6**, 230-244.e1 (2018).
- 409 31. Wright Muelas, M., Mughal, F., O’Hagan, S., Day, P. J. & Kell, D. B. The role and robustness of  
410 the Gini coefficient as an unbiased tool for the selection of Gini genes for normalising expression  
411 profiling data. *Sci. Rep.* **9**, 718007 (2019).
- 412 32. Gini, C. *Measurement of Inequality of Incomes. Source: The Economic Journal* vol. 31 (1921).
- 413 33. Brawand, D. *et al.* The evolution of gene expression levels in mammalian organs. *Nature* **478**,  
414 343–348 (2011).
- 415 34. GTEx Consortium, T. Gte. The Genotype-Tissue Expression (GTEx) project. *Nat. Genet.* **45**, 580–  
416 5 (2013).
- 417 35. Klijn, C. *et al.* A comprehensive transcriptional portrait of human cancer cell lines. *Nat.*  
418 *Biotechnol.* **33**, 306–312 (2015).
- 419 36. W.C., R., M., S., S., V. & J., D. CellMiner, a systems pharmacological web-application for the  
420 NCI-60 cancerous cell-lines: Updates, data integration, and translationally relevant results. *Cancer*  
421 *Research* vol. 76 no pagination (2016).
- 422 37. Reinhold, W. C. *et al.* CellMiner: A web-based suite of genomic and pharmacologic tools to  
423 explore transcript and drug patterns in the NCI-60 cell line set. *Cancer Res.* **72**, 3499–3511 (2012).
- 424 38. Shamie, I. *et al.* A Chinese hamster transcription start site atlas that enables targeted editing of  
425 CHO cells. *bioRxiv* 2020.10.09.334045 (2020) doi:10.1101/2020.10.09.334045.

- 426 39. Xiong, K. *et al.* Using targeted genome integration for virus-free genome-wide mammalian  
427 CRISPR screen. *bioRxiv* 2020.05.19.103648 (2020) doi:10.1101/2020.05.19.103648.
- 428 40. Aguirre, A. J. *et al.* Genomic Copy Number Dictates a Gene-Independent Cell Response to  
429 CRISPR/Cas9 Targeting. *Cancer Discov.* **6**, 914–29 (2016).
- 430 41. Meyers, R. M. *et al.* Computational correction of copy number effect improves specificity of  
431 CRISPR–Cas9 essentiality screens in cancer cells. *Nat. Genet.* **49**, 1779–1784 (2017).
- 432 42. Doench, J. G. *et al.* Optimized sgRNA design to maximize activity and minimize off-target effects  
433 of CRISPR-Cas9. *Nat. Biotechnol.* **34**, 184–191 (2016).
- 434 43. Shankavaram, U. T. *et al.* CellMiner: A relational database and query tool for the NCI-60 cancer  
435 cell lines. *BMC Genomics* (2009) doi:10.1186/1471-2164-10-277.
- 436 44. Cacheiro, P. *et al.* Human and mouse essentiality screens as a resource for disease gene discovery.  
437 *Nat. Commun.* **11**, (2020).
- 438 45. Rancati, G., Moffat, J., Typas, A. & Pavelka, N. Emerging and evolving concepts in gene  
439 essentiality. *Nature Reviews Genetics* vol. 19 34–49 (2018).
- 440 46. Palumbo, M. C., Colosimo, A., Giuliani, A. & Farina, L. Essentiality is an emergent property of  
441 metabolic network wiring. *FEBS Lett.* **581**, 2485–2489 (2007).
- 442 47. Bartha, I., Di Iulio, J., Venter, J. C. & Telenti, A. Human gene essentiality. *Nat. Rev. Genet.* **19**,  
443 51–62 (2018).
- 444 48. Ballouz, S. & Gillis, J. AuPairWise: A Method to Estimate RNA-Seq Replicability through Co-  
445 expression. *PLoS Comput. Biol.* **12**, e1004868 (2016).
- 446 49. Zhang, Y., Li, D. & Sun, B. Do housekeeping genes exist? *PLoS One* **10**, (2015).
- 447 50. King, Z. A. *et al.* BiGG Models: A platform for integrating, standardizing and sharing genome-  
448 scale models. *Nucleic Acids Res.* **44**, D515-22 (2016).
- 449 51. Ganter, M., Bernard, T., Moretti, S., Stelling & Pagni, M. MetaNetX.org: A website and  
450 repository for accessing, analysing and manipulating metabolic networks. *Bioinformatics* **29**, 815–  
451 816 (2013).
- 452 52. Harzing, A. W. Publish or Perish. available from <http://www.harzing.com/pop.htm>  
453 <http://harzing.com/pop.htm> (2007).
- 454 53. Ke, W., Drangowska-Way, A., Katz, D., Siller, K. & O’Rourke, E. J. The ancient genetic networks  
455 of obesity: Whole-animal automated screening for conserved fat regulators. in *Methods in*  
456 *Molecular Biology* vol. 1787 129–146 (Humana Press Inc., 2018).
- 457 54. Shorrocks, A. Income inequality and income mobility. *J. Econ. Theory* **19**, 376–393 (1978).
- 458 55. Thomas, V., Wang, Y., Fan, X. & Bank, W. Measuring Education Inequality: Gini Coefficients of  
459 Education. *World* 1–37 (2000) doi:10.1596/1813-9450-2525.

## 460 **Figure Captions**

461 **Figure 1. Analysis of previously identified housekeeping genes.** (A) Glyceraldehyde 3-phosphate  
462 dehydrogenase (GAPDH) may not be a good choice for housekeeping gene. Gini coefficients were  
463 converted to percentiles (x-axis) using each of the datasets (y-axis). GAPDH has high Gini coefficient in

464 most of the datasets. (B) Coverage of previously identified 3688 housekeeping genes<sup>16</sup> within the 3688  
465 Gini genes with lowest Gini coefficients within each of the datasets.

466 **Figure 2. Gini coefficients are highly correlated for human datasets.** (A) Gini coefficients of genes are  
467 highly correlated across human datasets, regardless of sample type. Datasets of sample types are more  
468 highly correlated than those of different sample types. (B) GO term coverage is highly correlated across  
469 human datasets.

470 **Figure 3. Gini coefficients accurately capture organism-specific differences.** (A-B) Jaccard similarity  
471 between Gini genes identified using organism-specific transcriptomes capture cluster containing primates.  
472 The number of Gini genes with 1:1 orthologs in all organisms is shown using the bar plot on the right of  
473 the dendrogram. (C) Principal component 1 (PC1) also captures the cluster containing primates. Also  
474 shown are top 20 (pink), middle 20 (green), and bottom 20 (blue) coefficients of the first principal  
475 components. (D) Correlation among Gini coefficients across different organisms reproduce cluster  
476 containing primates (left panel). The Gini coefficients of genes belonging to top 20, middle 20, and  
477 bottom 20 coefficients of PC1 are shown (right panel). Top 20 Gini genes are specific to primates, middle  
478 20 are universal Gini genes, and bottom 20 are specific to non-primates. (E) GO term coverage is highly  
479 correlated across different datasets, also shown are the GO term correlations with human datasets used in  
480 Figure 1.

481 **Figure 4. Gini genes are essential.** Gini coefficients of essential genes compared to the complete (A)  
482 CellMiner, (B) Klijn et al. cancer datasets, and (C) CHO datasets. 2800 genes essential in 20 cell lines  
483 were extracted from DepMap<sup>40,41</sup>, and 338 CHO essential genes were extracted from Kai et al.<sup>39</sup> (D) GO  
484 term coverage of essential genes and that of Gini genes from CellMiner (blue, 0.8557), Klijn et al.  
485 (yellow, 0.8907), and CHO (green, 0.7055) are correlated. The slightly lower correlation in CHO cells is  
486 likely due to fewer number of essential genes in CHO.



**(A)**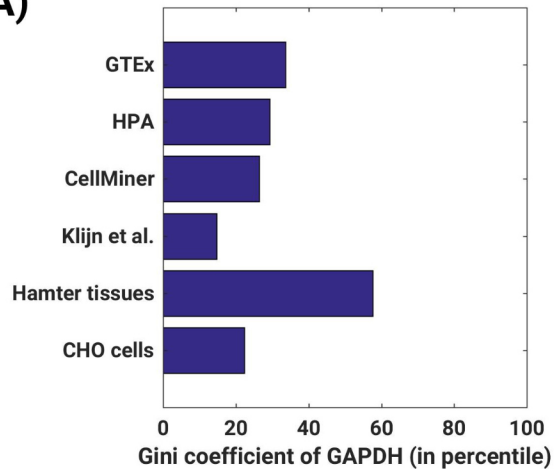**(B)**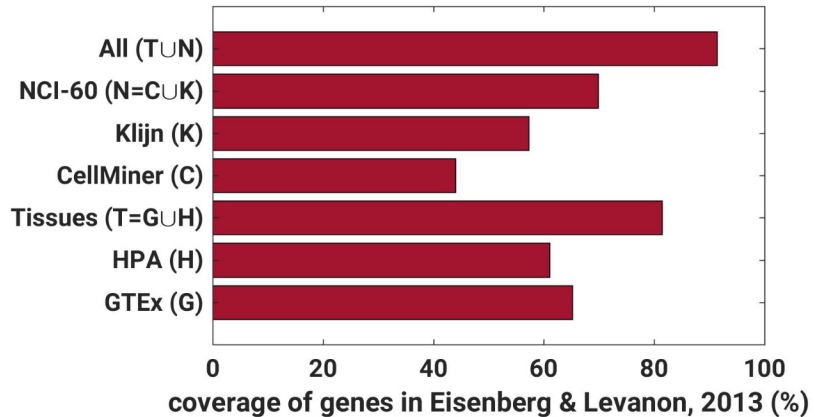

**(A)**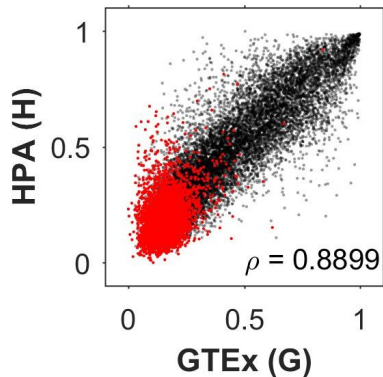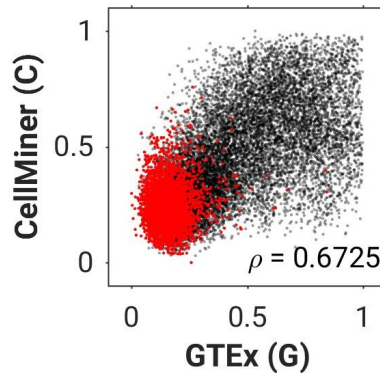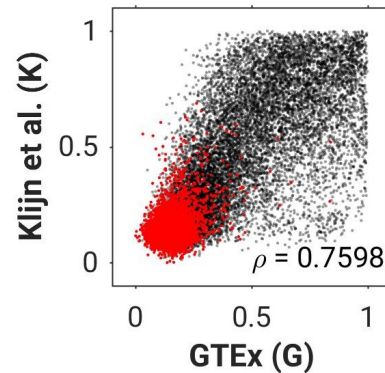**(B)**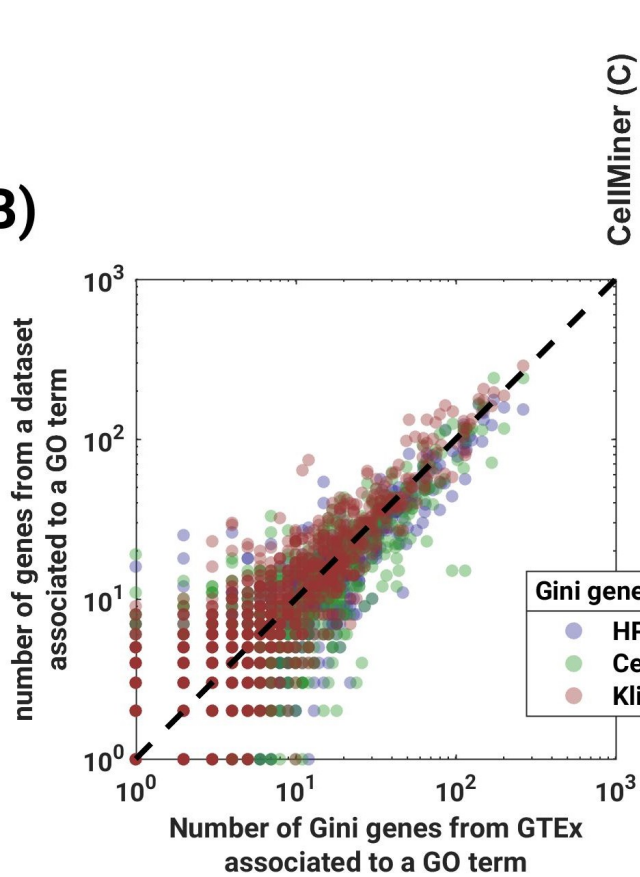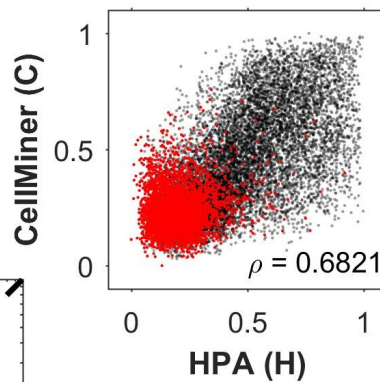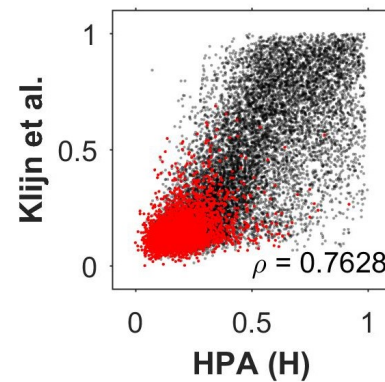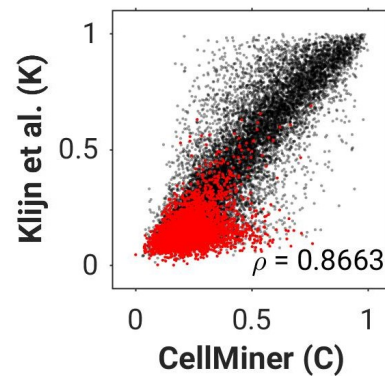

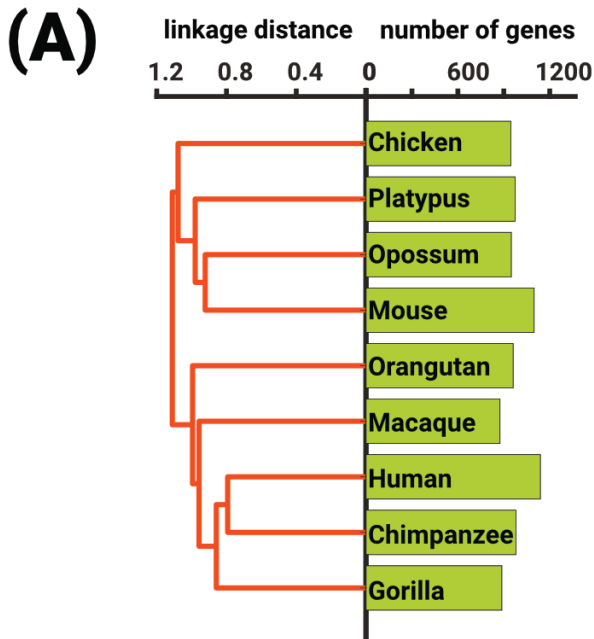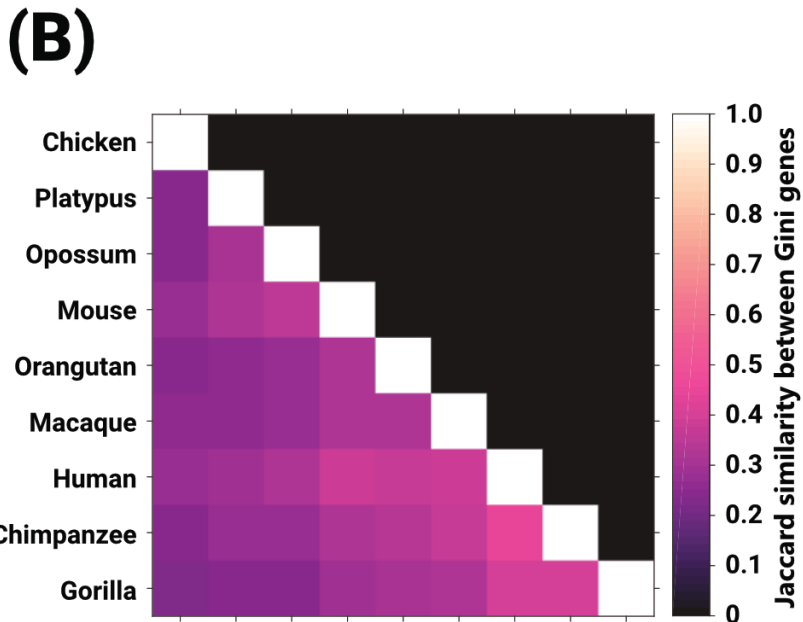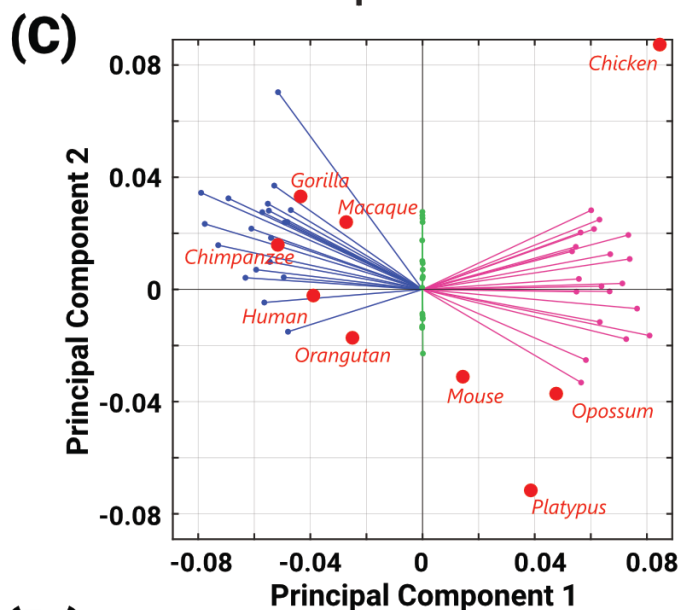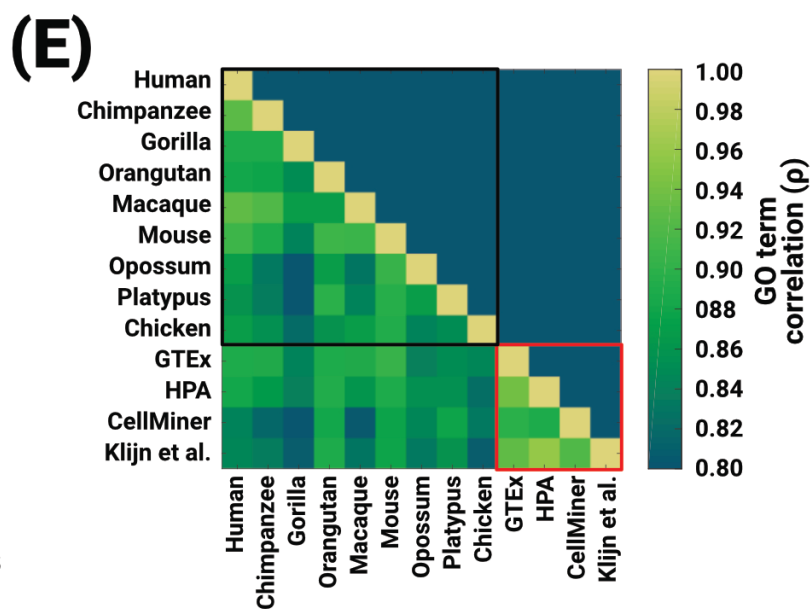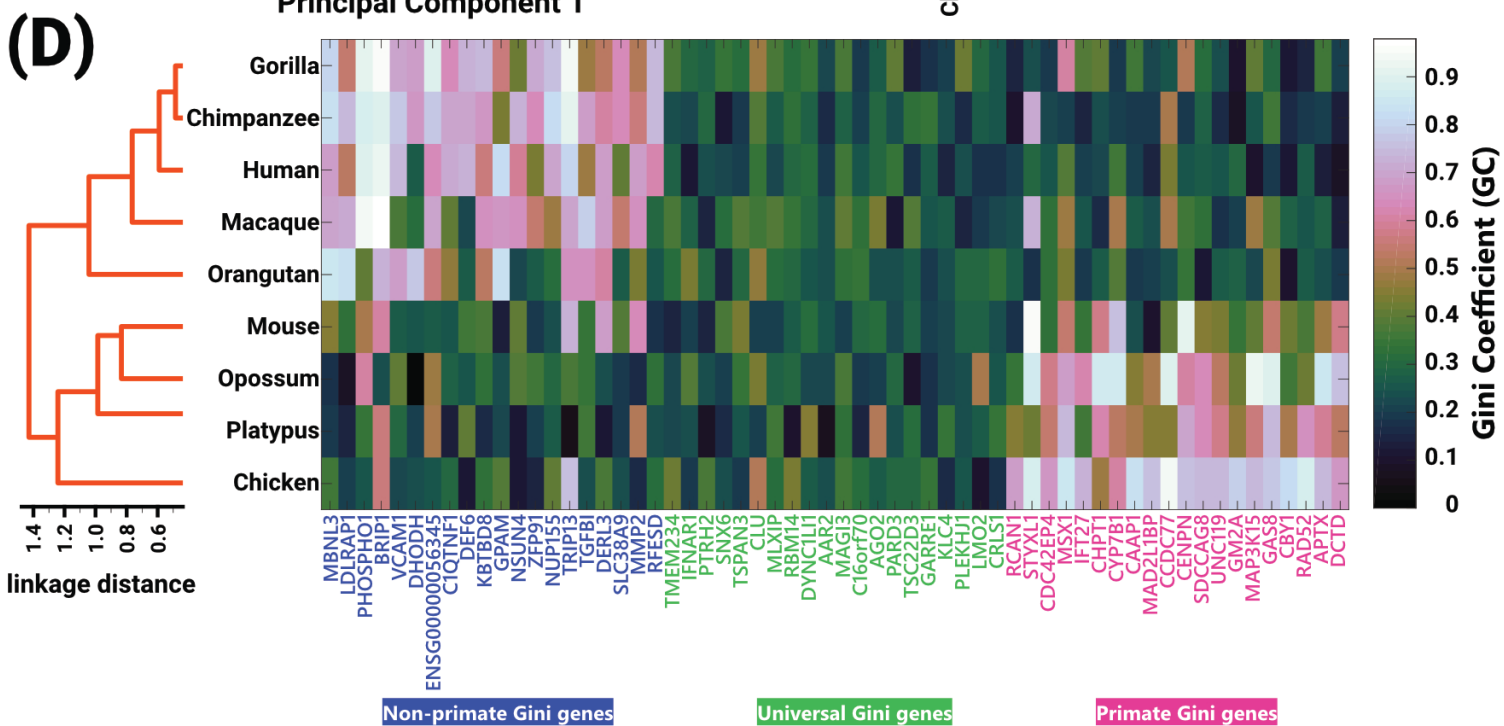

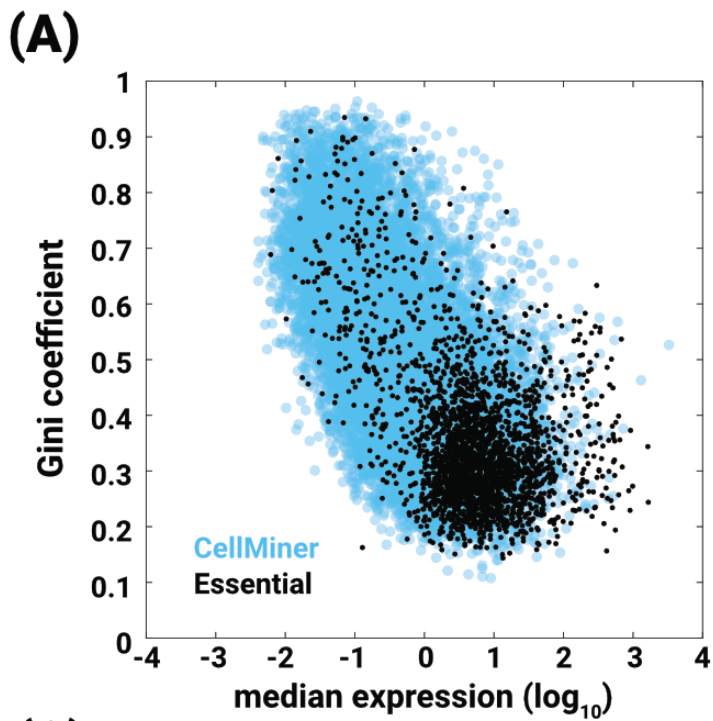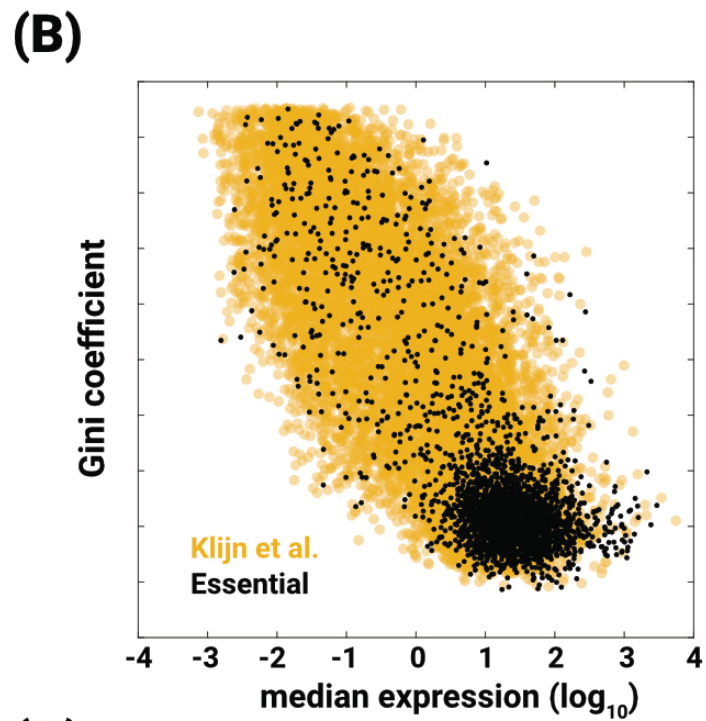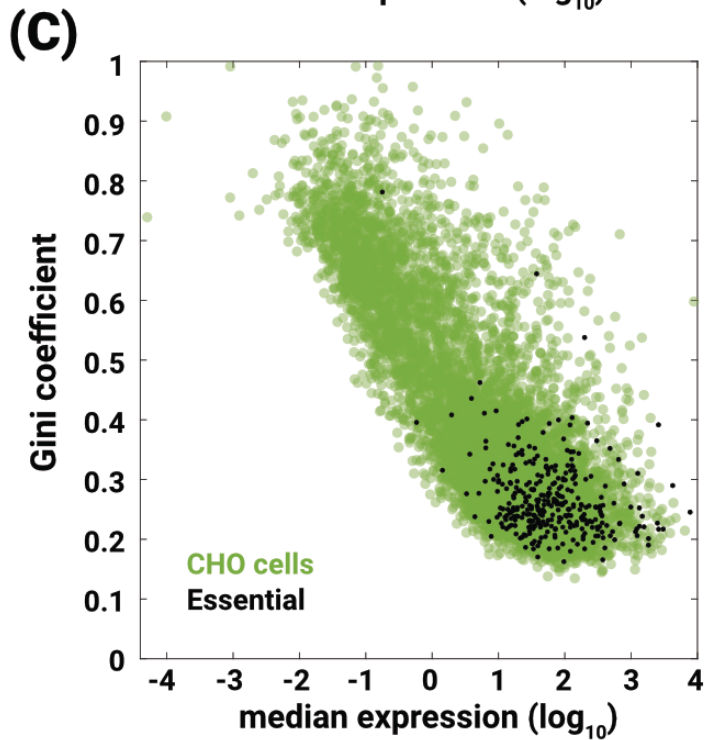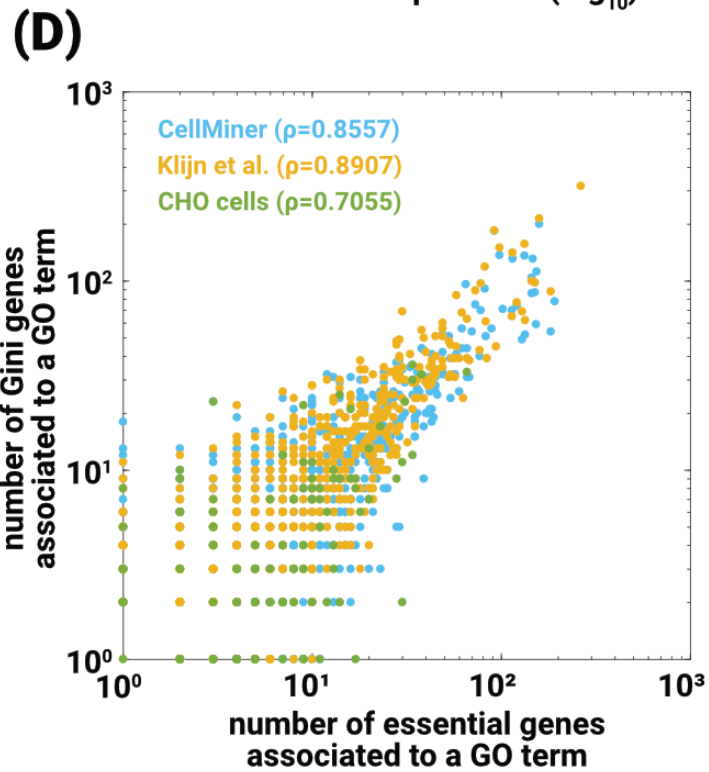

Source: https://www.biorxiv.org/content/10.1101/2021.02.14.431149v1.full.pdf
